# Supplementary material for: Bioactive Collagen Hydrolysate-Chitosan/Essential Oil Electrospun Nanofibers Designed for Medical Wound Dressings
Source: MDPI journal article supplement (doi:10.3390/pharmaceutics13111939), 2021-11-16
Supplement: s1 [file s1]

# Supplementary Materials: Bioactive Collagen Hydrolysate - Chitosan/Essential Oils Electrospun Nanofibers Designed for Medical Wound Dressings

Maria Răpă, Carmen Gaidau, Liliana Mititelu-Tartau, Mariana-Daniela Berechet, Andrei Constantin Berbecaru, Irina Rosca, Aurica P. Chiriac, Ecaterina Matei, Andra-Mihaela Predescu and Cristian Predescu

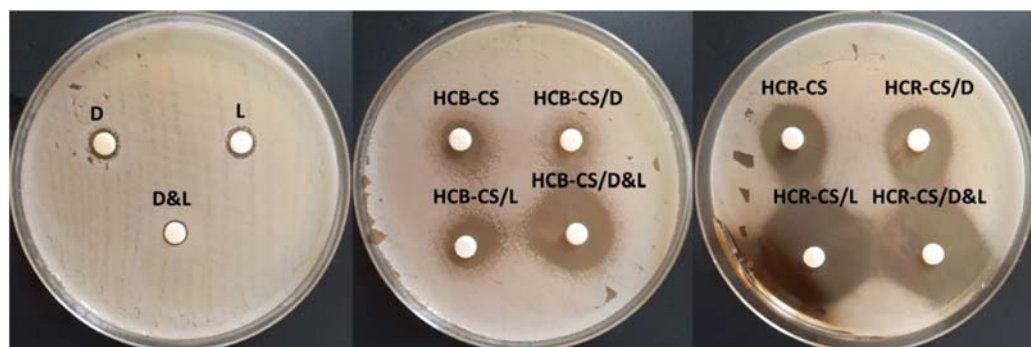

**Figure S1.** Photographs of the antibacterial activity of the tested samples against *S. aureus*.

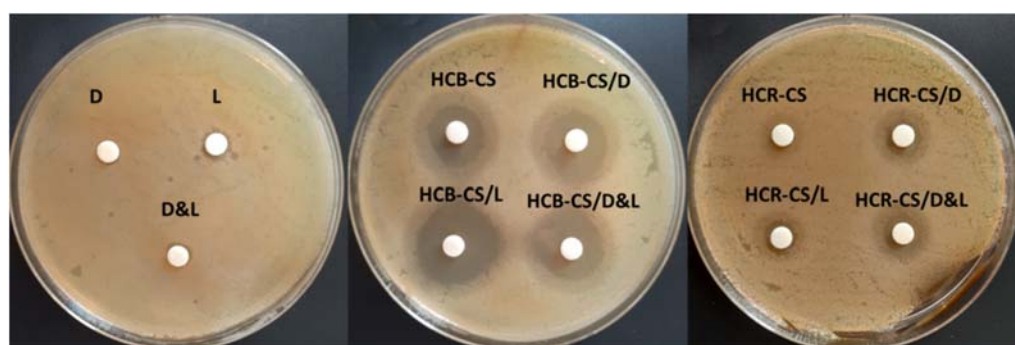

**Figure S2.** Photographs of the antibacterial activity of the tested samples against *E. coli*.

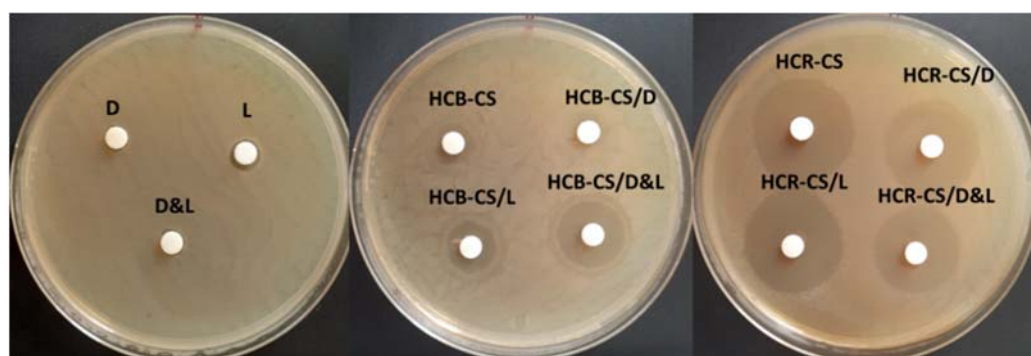

**Figure S3.** Photographs of the antibacterial activity of the tested samples against *E. faecalis*.

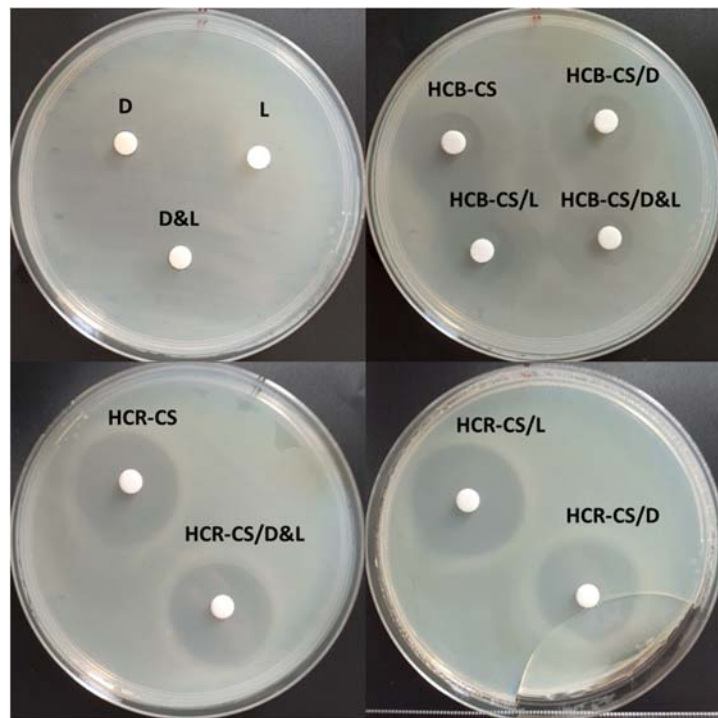

**Figure S4.** Photographs of the antibacterial activity of the tested samples against *S. typhimurium*.

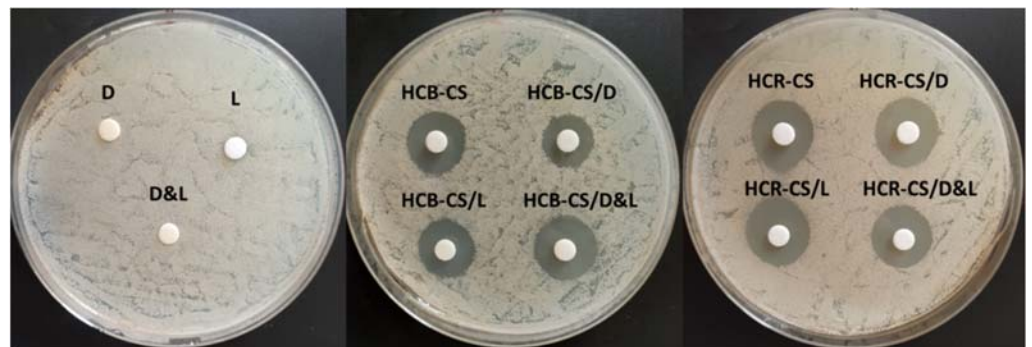

**Figure S5.** Photographs of the antifungal activity of the tested samples against *C. albicans*.

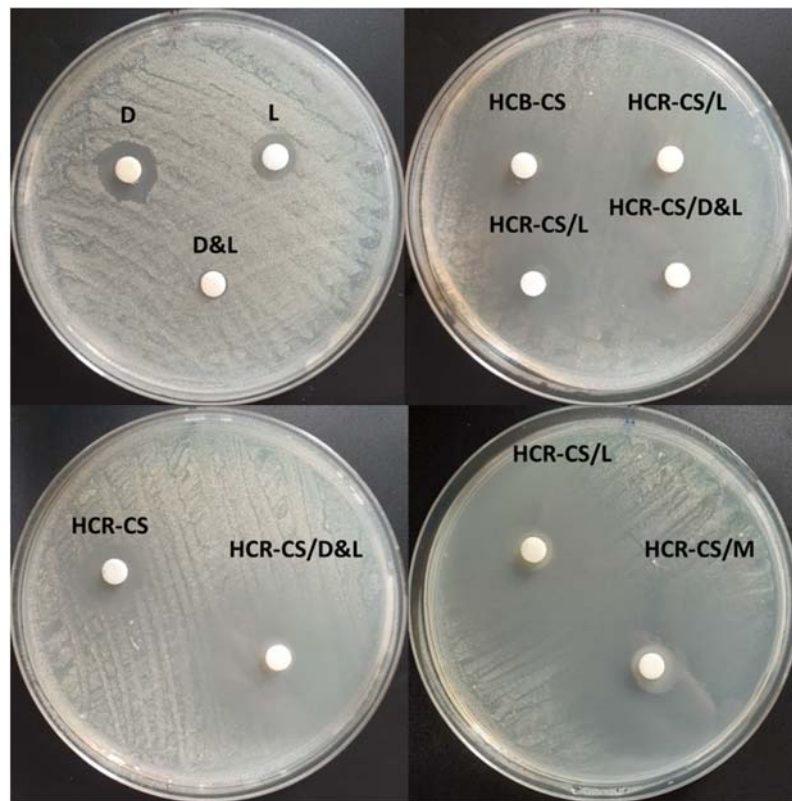

**Figure S6.** Photographs of the antifungal activity of the tested samples against *C. glabrata*.

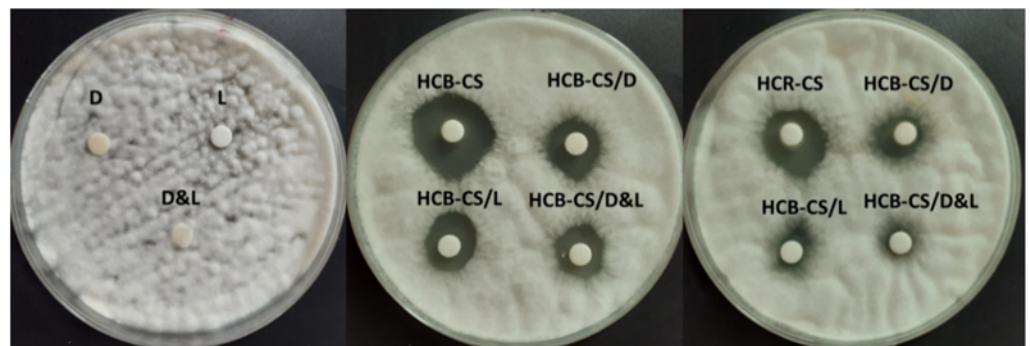

**Figure S7.** Photographs of the antifungal activity of the tested samples against *A. brasiliensis*.
